# Supplementary material for: Molten salt-assisted synthesis of bismuth nanosheets with long-term cyclability at high rates for sodium-ion batteries
Source: Royal Society of Chemistry journal article supplement (doi:10.1039/d3ra03767c), 2023-01-01
Supplement: d3ra03767c1.pdf [file d3ra03767c1.pdf]

## Supporting information

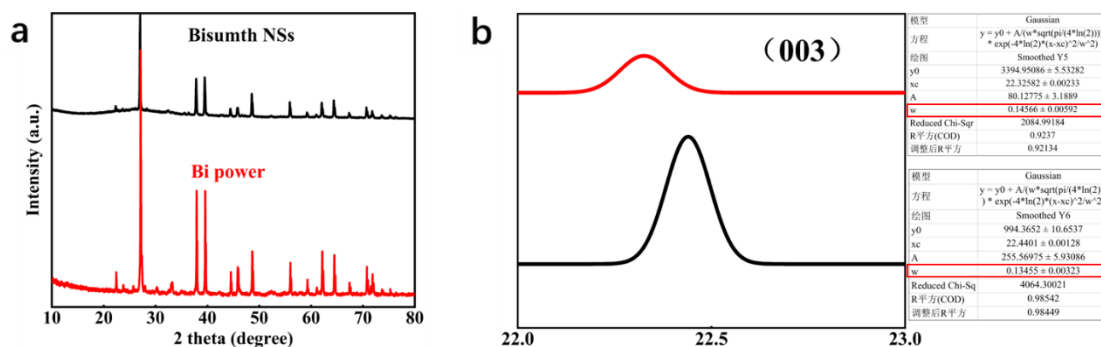

**Fig. S1.** (a) XRD pattern of the Bismuth NSs and commercial Bi powder, and (b) Enlargement of (a).

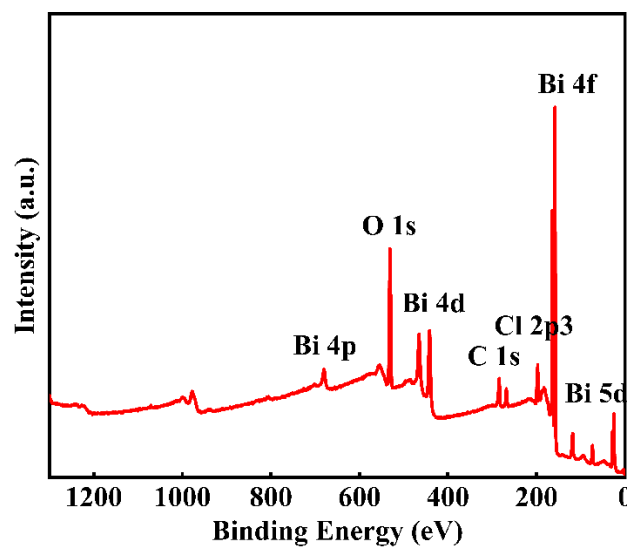

**Fig.S2.** XPS spectra of Full survey.

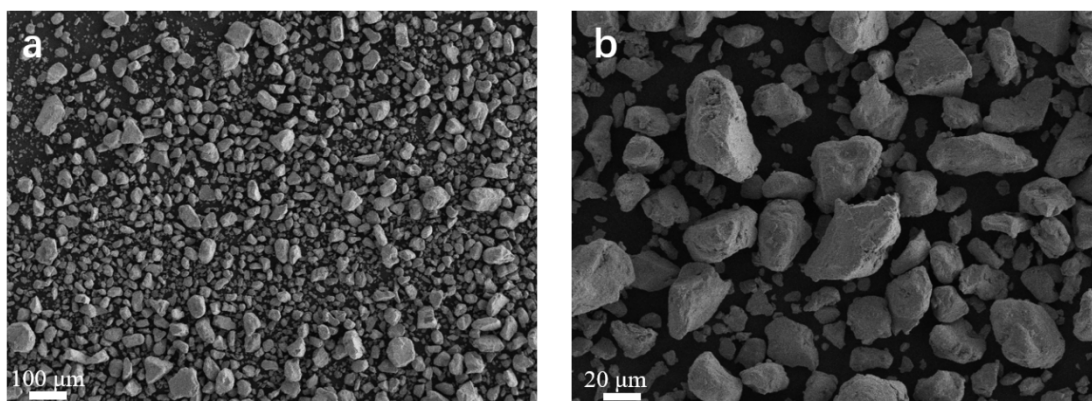

**Fig.S3.** SEM images of commercial bi powder

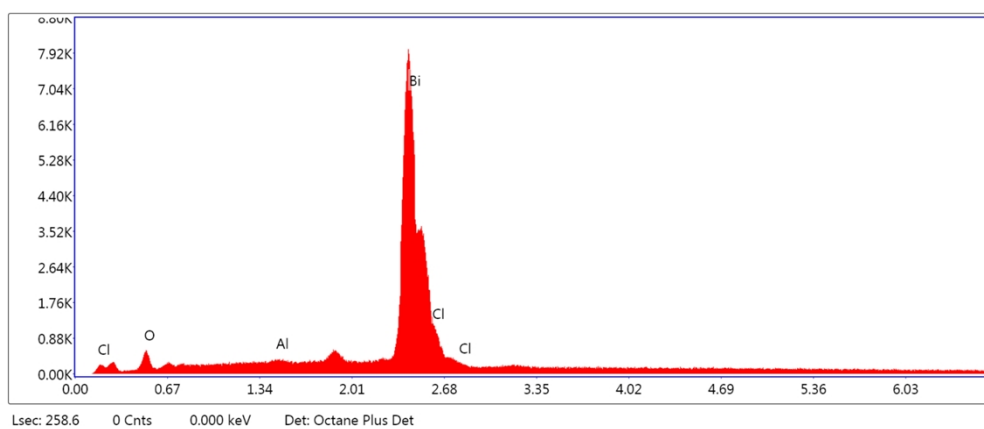

**Fig.S4.** Elemental mappings of Bismuth NSs.

**Table S1.** The Elemental content of Bismuth NSs

| Element | Weight % | Atomic % | Net Int. | Kratio | Z      | R      | A      | F      |
|---------|----------|----------|----------|--------|--------|--------|--------|--------|
| O K     | 2.35     | 20.03    | 19.20    | 0.0128 | 1.8075 | 0.7032 | 0.3025 | 1.0000 |
| AlK     | 0.00     | 0.00     | 0.00     | 0.0000 | 1.5965 | 0.7541 | 0.6901 | 1.0013 |
| BiM     | 92.60    | 60.50    | 522.70   | 0.9203 | 0.9554 | 1.0332 | 1.0146 | 1.0254 |
| ClK     | 5.05     | 19.47    | 50.50    | 0.0584 | 1.5310 | 0.7969 | 0.7534 | 1.0009 |

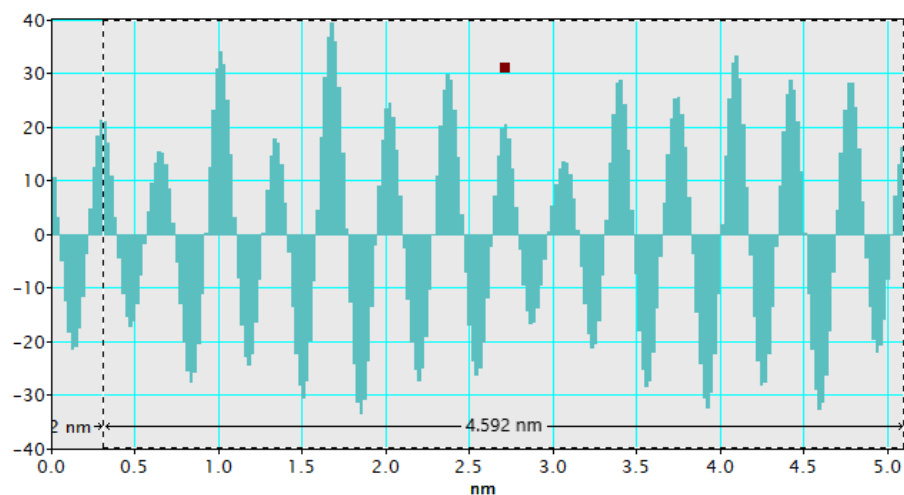

Fig.S5 Lattice profiles of the (012).

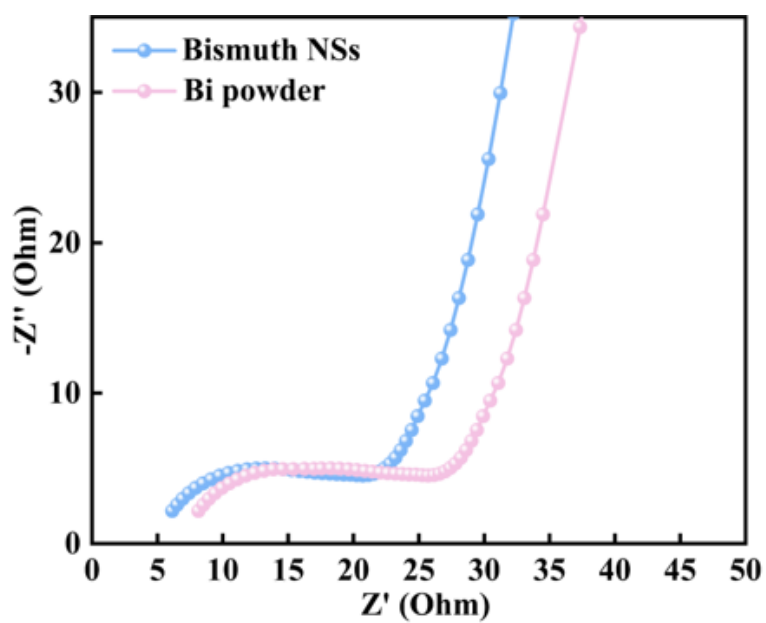

Fig.S6 The electrochemical impedance spectra of Bismuth NSs and commercial bi powder electrodes at initial cycle.

Table S2. Charge transfer resistance ( $R_{ct}$ ) of different cycles after fitting.

| Different cycles | $R_{ct}$ ( $\Omega$ ) |
|------------------|-----------------------|
| 1                | 38.36                 |
| 100              | 2.96                  |
| 1000             | 1.78                  |

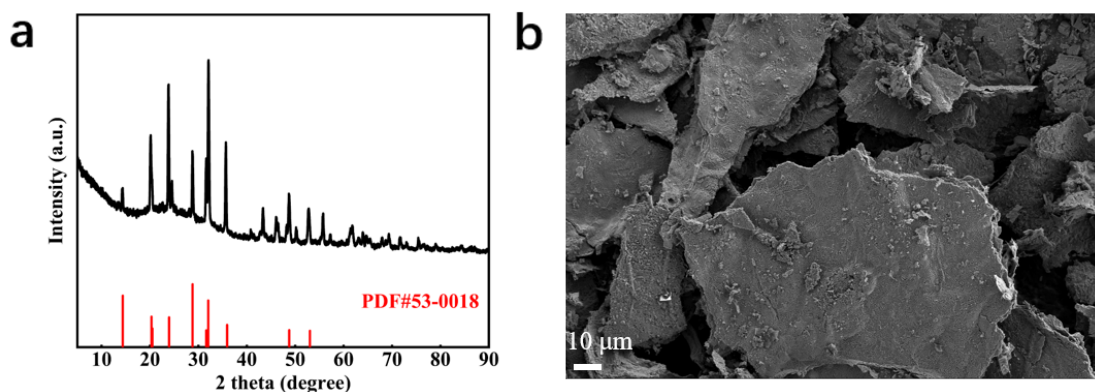

Fig.S7 . (a) XRD pattern (b) SEM images of NVP@rGO.

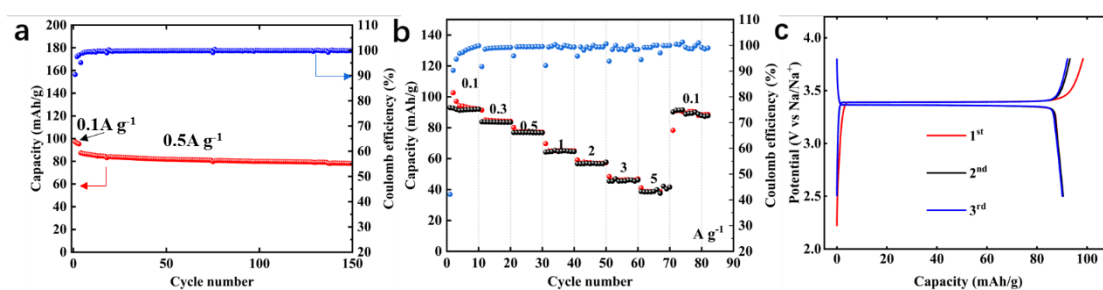

Fig.S8. Electrochemical performance of the NVP@RGO (a) cycling performance with the corresponding Coulombic efficiency at  $0.5 \text{ A g}^{-1}$  (b) rate performance (c) galvanostatic charge/discharge curves at  $0.1 \text{ A g}^{-1}$ .

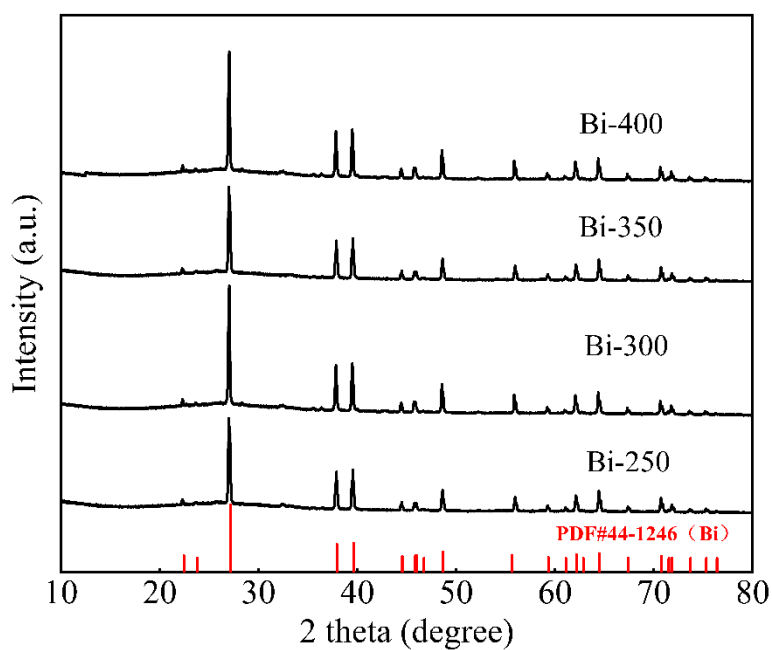

Fig.S9. XRD pattern of Bismuth NSs prepared at different temperatures.

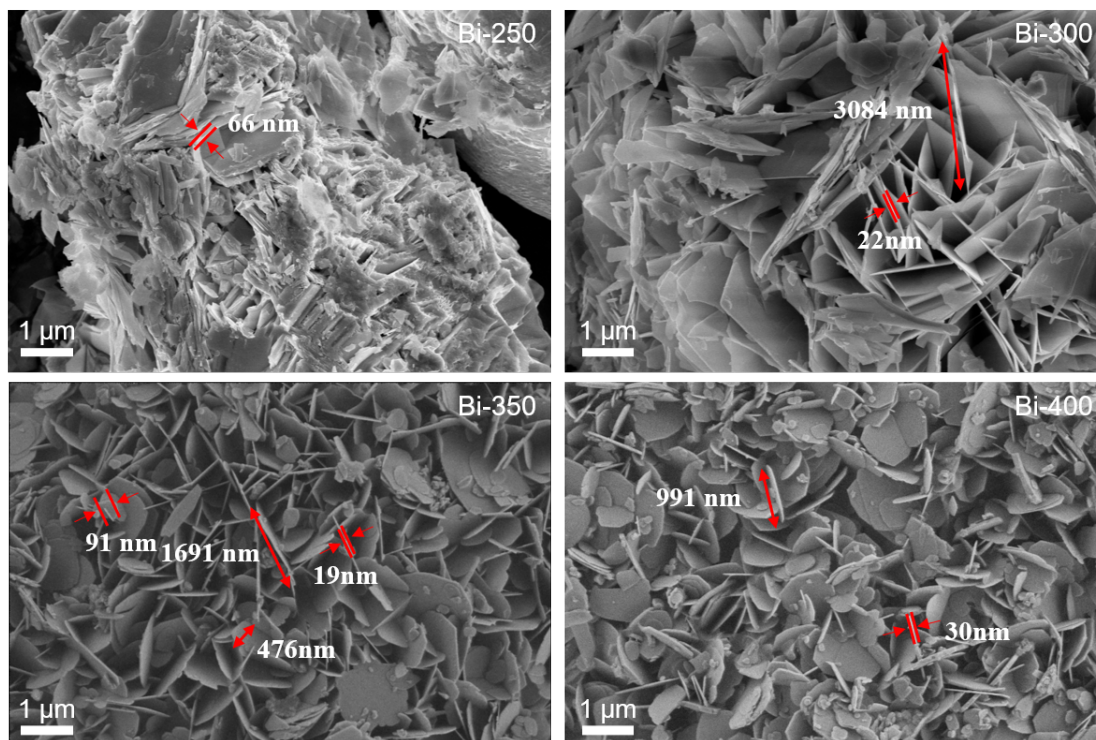

**Fig.S10.** SEM images of Bismuth NSs prepared at different temperatures.

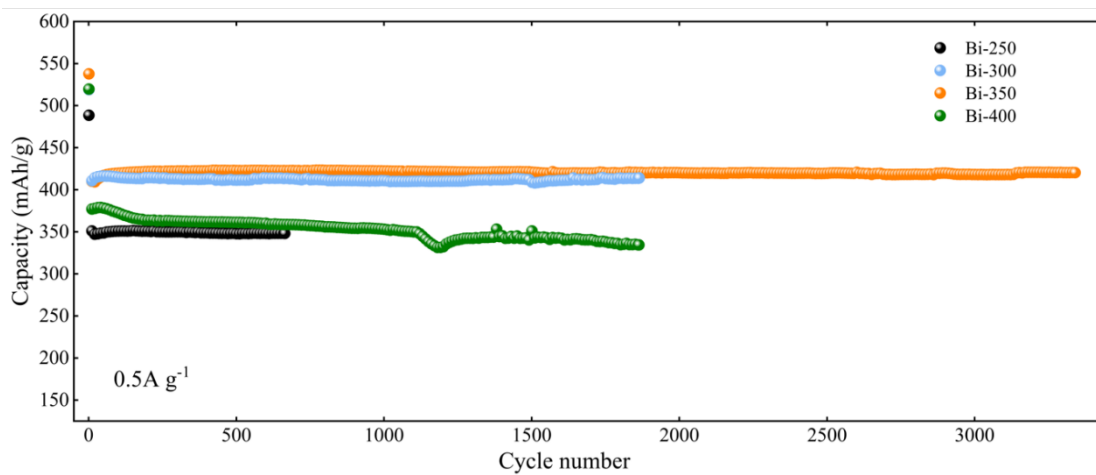

**Fig.S11.** Electrochemical performance of the Bismuth NSs prepared at different temperatures.

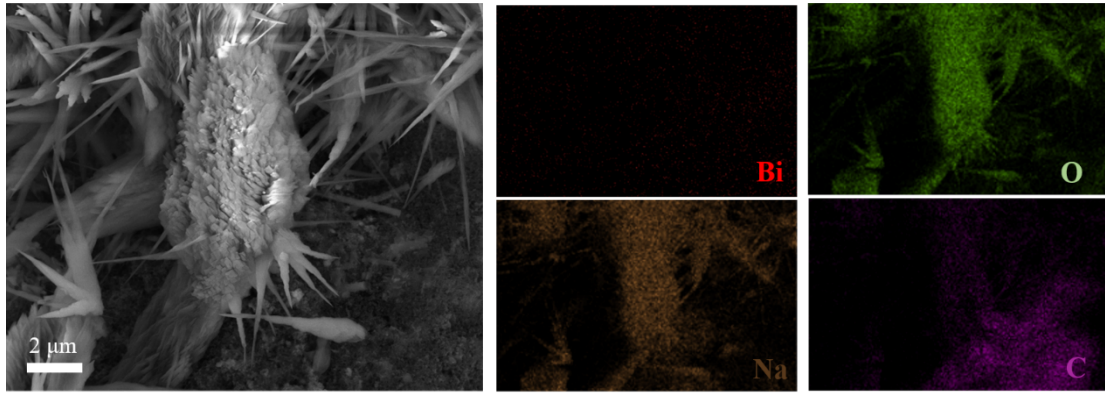

**Fig.S12.** SEM mappings of commercial bi powder electrodes.

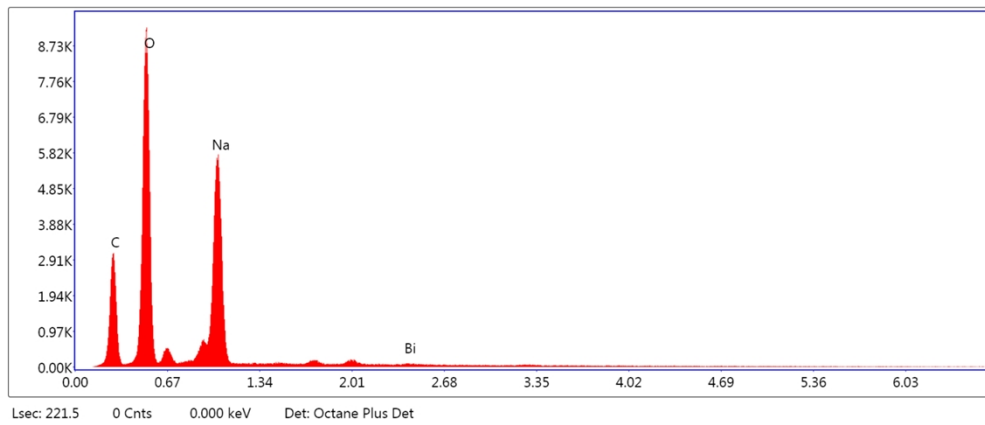

**Fig.S13.** Elemental mappings of commercial bi powder electrodes.

**Table S2.** The Elemental content of commercial bi powder electrodes.

| Element | Weight % | Atomic % | Net Int. | Error % | Kratio | Z      | R      | A      | F      |
|---------|----------|----------|----------|---------|--------|--------|--------|--------|--------|
| C K     | 22.01    | 30.42    | 153.90   | 7.57    | 0.1141 | 1.0860 | 0.9748 | 0.4773 | 1.0000 |
| O K     | 43.80    | 45.44    | 500.20   | 5.84    | 0.2818 | 1.0257 | 0.9939 | 0.6273 | 1.0000 |
| NaK     | 33.35    | 24.08    | 398.00   | 4.84    | 0.2280 | 0.9183 | 1.0157 | 0.7438 | 1.0009 |
| BiM     | 0.84     | 0.07     | 3.90     | 16.08   | 0.0059 | 0.5245 | 1.3583 | 1.1222 | 1.1815 |

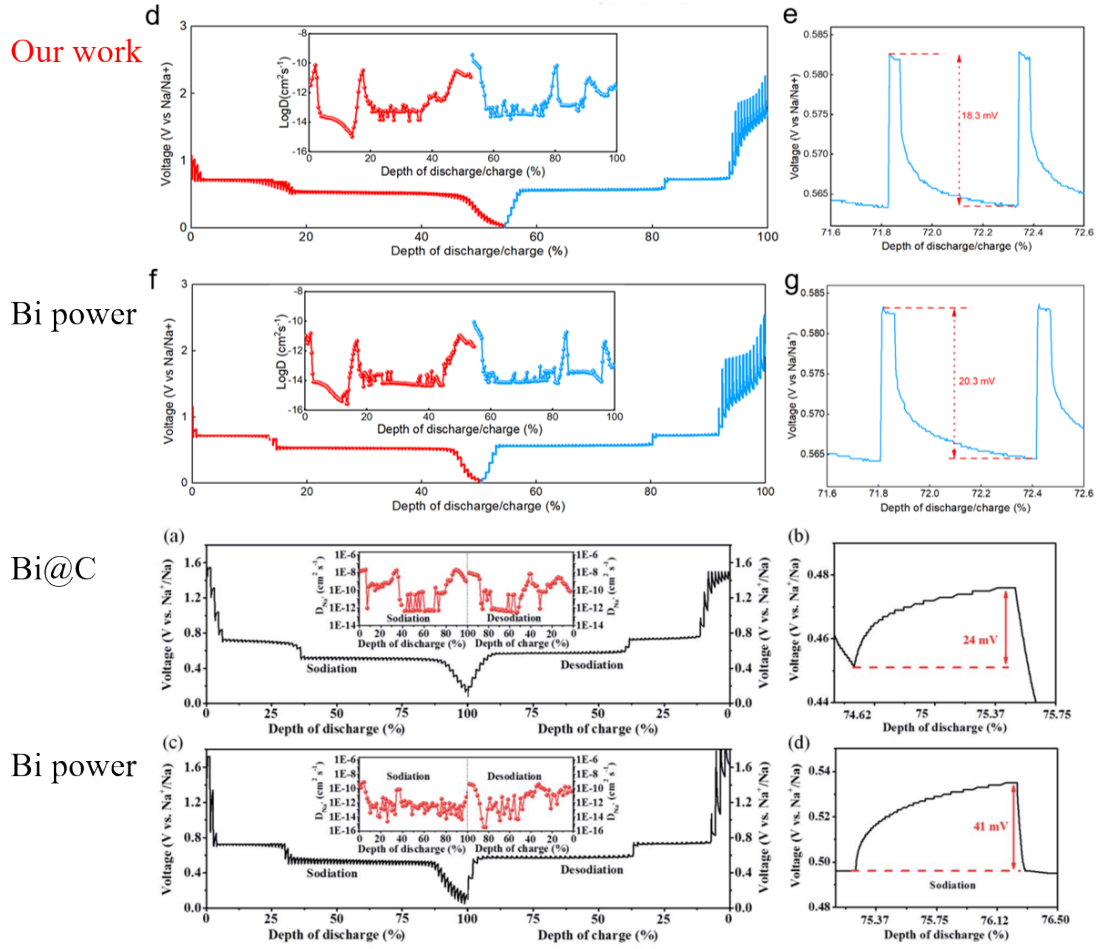

**Fig.S14.** Comparison of polarization values for different bismuth electrodes.
